# Supplementary material for: Renal care readiness and gaps in early detection of sickle cell nephropathy in children in North Kivu Province, Democratic Republic of the Congo: an exploratory cross-sectional study
Source: Research Square preprint supplement (doi:10.21203/rs.3.rs-8630909/v1), 2026-02-11
Supplement: Supplementary file 1 [file 2a7632c71650a04e9fbc1861.docx]

# Additional file 1. Knowledge score by item

| **Rank** | **Item** | **Question (abridged)** | **Correct answer** | **Correct / Total (n)** | **% correct (95% CI)** |
| --- | --- | --- | --- | --- | --- |
| 1 | K14 | An eGFR < 90 ml/min/1.73 m² is pathological | True | 85 / 200 | 42.5 (35.9–49.4) |
| 2 | K11 | Cystatin C is more sensitive than creatinine for estimating GFR | True | 92 / 200 | 46.0 (39.2–52.9) |
| 3 | K5 | SCN is always symptomatic at onset | False | 97 / 200 | 48.5 (41.7–55.4) |
| 4 | K4 | Hyposthenuria is an early sign of kidney damage | True | 99 / 200 | 49.5 (42.6–56.4) |
| 5 | K13 | Pediatric GFR is calculated using the Schwartz formula | True | 99 / 200 | 49.5 (42.6–56.4) |
| 6 | K7 | Urine dipstick testing is the basic screening test | True | 105 / 200 | 52.5 (45.6–59.3) |
| 7 | K17 | ACE inhibitors/ARBs are indicated in persistent microalbuminuria | True | 106 / 200 | 53.0 (46.1–59.8) |
| 8 | K16 | Elevated cystatin C reflects reduced GFR | True | 106 / 200 | 53.0 (46.1–59.8) |
| 9 | K15 | Creatinine alone may underestimate early kidney damage | True | 111 / 200 | 55.5 (48.6–62.2) |
| 10 | K9 | Proteinuria must be confirmed by 2 positive tests out of 3 | True | 115 / 200 | 57.5 (50.6–64.1) |
| 11 | K12 | Blood pressure measurement is part of screening | True | 123 / 200 | 61.5 (54.6–68.0) |
| 12 | K18 | Hydroxyurea may slow renal complications | True | 145 / 200 | 72.5 (65.9–78.2) |
| 13 | K21 | NSAIDs may worsen nephropathy | True | 150 / 200 | 75.0 (68.6–80.5) |
| 14 | K10 | UACR is more precise than urine dipstick | True | 154 / 200 | 77.0 (70.7–82.3) |
| 15 | K22 | Annual urine, creatinine and BP monitoring is recommended | True | 162 / 200 | 81.0 (75.0–85.8) |
| 16 | K3 | Sickle cell disease may cause kidney damage from early childhood | True | 165 / 200 | 82.5 (76.6–87.1) |
| 17 | K8 | Microalbuminuria indicates early glomerular damage | True | 169 / 200 | 84.5 (78.8–88.9) |
| 18 | K2 | Rapid diagnostic tests are reliable in low-resource settings | True | 174 / 200 | 87.0 (81.6–91.0) |
| 19 | K6 | Renal risk increases with age, crises and dehydration | True | 182 / 200 | 91.0 (86.2–94.2) |
| 20 | K19 | Persistent proteinuria requires specialist referral | True | 193 / 200 | 96.5 (93.0–98.3) |
| 21 | K20 | Hydration and UTI prevention protect renal function | True | 194 / 200 | 97.0 (93.6–98.6) |
| 22 | K23 | Multidisciplinary follow-up improves early detection | True | 196 / 200 | 98.0 (95.0–99.2) |
| 23 | K1 | Definitive diagnosis of SCD is made by hemoglobin electrophoresis | True | 197 / 200 | 98.5 (95.7–99.5) |

Additional file 1 presents the distribution of correct responses across individual knowledge items related to sickle cell nephropathy. Overall, respondents demonstrated strong mastery of general concepts, including the severity of renal involvement, the importance of hydration, prevention of urinary tract infections, and the need for specialist referral in cases of persistent proteinuria, with correct response rates exceeding 90% for several items. In contrast, notable knowledge gaps were observed for more technical aspects of renal assessment, particularly pediatric glomerular filtration rate estimation, the role of cystatin C, early and silent manifestations of nephropathy, and practical screening modalities such as urine dipstick interpretation and confirmation of proteinuria. Items related to therapeutic decision-making, including indications for ACE inhibitors or ARBs in persistent microalbuminuria, also showed suboptimal performance.
