# Supplementary material for: Renal care readiness and gaps in early detection of sickle cell nephropathy in children in North Kivu Province, Democratic Republic of the Congo: an exploratory cross-sectional study
Source: Research Square preprint supplement (doi:10.21203/rs.3.rs-8630909/v1), 2026-02-11
Supplement: Supplementary file 2 [file 368b27f125dc50d6d8109821.docx]

# Additional file 2. Respondents’ attitudes toward screening for sickle cell nephropathy (N = 200)

| **Rank** | **Item** | **Attitude assessed** | **Strongly agree (n)** | **%** | **95% CI** |
| --- | --- | --- | --- | --- | --- |
| 1 | 33 | Team-based care (pediatrician, nurse, biologist) improves screening effectiveness | 150 | 75.0 | 68.6–80.5 |
| 2 | 30 | Children with sickle cell disease should undergo renal screening at each annual visit | 131 | 65.5 | 58.7–71.7 |
| 3 | 32 | Parents should be better educated about renal monitoring | 131 | 65.5 | 58.7–71.7 |
| 4 | 35 | Health authorities should integrate renal monitoring into national guidelines | 127 | 63.5 | 56.6–69.9 |
| 5 | 27 | Lack of adequate equipment, reagents, or dipsticks makes screening difficult | 111 | 55.5 | 48.6–62.2 |
| 6 | 25 | The cost of tests often limits systematic screening | 109 | 54.5 | 47.6–61.3 |
| 7 | 29 | Cystatin C should be available in secondary and tertiary hospitals for early screening | 100 | 50.0 | 43.1–56.9 |
| 8 | 31 | Early screening is a low priority compared with prevention of vaso-occlusive crises | 58 | 29.0 | 23.2–35.6 |
| 9 | 24 | Early screening of renal complications is a priority in my facility | 53 | 26.5 | 20.9–33.0 |
| 10 | 28 | I feel sufficiently trained to interpret renal-related laboratory and urine test results | 26 | 13.0 | 9.0–18.4 |
| 11 | 26 | Simple urine tests alone are sufficient to identify early renal damage | 24 | 12.0 | 8.2–17.2 |
| 12 | 34 | Workload constraints prevent implementation of protocols | 20 | 10.0 | 6.6–14.9 |

Additional file 2 summarizes respondents’ attitudes toward screening for sickle cell nephropathy. Overall, attitudes were moderately favorable, with a majority of respondents strongly agreeing on the importance of team-based care, annual renal screening for children with sickle cell disease, parental education, and the integration of renal monitoring into national guidelines. At the same time, structural and economic constraints were widely acknowledged, including limited availability of equipment and reagents, as well as the cost of laboratory tests, which were perceived as major barriers to systematic screening. In contrast, relatively few respondents strongly agreed that early renal screening is currently a priority within their health facilities or that they feel sufficiently trained to interpret renal-related laboratory and urine test results.
