# Supplementary material for: Renal care readiness and gaps in early detection of sickle cell nephropathy in children in North Kivu Province, Democratic Republic of the Congo: an exploratory cross-sectional study
Source: Research Square preprint supplement (doi:10.21203/rs.3.rs-8630909/v1), 2026-02-11
Supplement: Supplementary file 3 [file 7cfac9d2818b2a6b93d95c91.docx]

# Additional file 3. Respondents’ practices related to screening for sickle cell nephropathy (N = 169)

| **Rank** | **Item** | **Practice assessed** | **Always (n)** | **%** | **95% CI** | **Often (n)** | **% (95% CI)** |
| --- | --- | --- | --- | --- | --- | --- | --- |
| 1 | 45 | You record urine and laboratory results in the follow‑up file | 62 | 36.7 | 29.8–44.2 | 41 | 24.3 (18.4–31.2) |
| 2 | 49 | You work in coordination with medical biologists or laboratory staff for case follow‑up | 40 | 23.7 | 17.9–30.6 | 40 | 23.7 (17.9–30.6) |
| 3 | 44 | You systematically recommend hydroxyurea in children with sickle cell disease | 39 | 23.1 | 17.4–30.0 | 36 | 21.3 (15.8–28.1) |
| 4 | 47 | You educate parents on the importance of renal follow‑up | 35 | 20.7 | 15.3–27.4 | 36 | 21.3 (15.8–28.1) |
| 5 | 46 | You refer children with persistent proteinuria to pediatric nephrology | 30 | 17.8 | 12.7–24.2 | 34 | 20.1 (14.8–26.8) |
| 6 | 39 | You confirm proteinuria detected by dipstick with quantitative testing | 9 | 5.3 | 2.8–9.8 | 19 | 11.2 (7.3–16.9) |
| 7 | 43 | You prescribe an ACE inhibitor or ARB in cases of persistent microalbuminuria | 9 | 5.3 | 2.8–9.8 | 14 | 8.3 (5.0–13.4) |
| 8 | 42 | You assess microalbuminuria on two samples before drawing conclusions | 8 | 4.7 | 2.4–9.1 | 14 | 8.3 (5.0–13.4) |
| 9 | 37 | You measure blood pressure at every visit of a child with sickle cell disease | 6 | 3.6 | 1.6–7.5 | 14 | 8.3 (5.0–13.4) |
| 10 | 38 | You perform urine dipstick testing at least once a year in children with sickle cell disease | 6 | 3.6 | 1.6–7.5 | 21 | 12.4 (8.3–18.2) |
| 11 | 40 | You request a urine albumin‑to‑creatinine ratio (UACR) when available | 5 | 3.0 | 1.3–6.7 | 10 | 5.9 (3.2–10.5) |
| 12 | 48 | You participate in training on sickle cell disease and its complications | 3 | 1.8 | 0.6–5.1 | 16 | 9.5 (5.9–14.8) |
| 13 | 41 | You check serum creatinine and estimate GFR (Schwartz) at least once a year | 2 | 1.2 | 0.3–4.2 | 8 | 4.7 (2.4–9.1) |

Additional file 3 describes respondents’ self-reported practices related to screening and follow-up of sickle cell nephropathy. Overall, the implementation of recommended practices was limited, as reflected by the low proportions of respondents reporting that they “always” or “often” perform key screening and monitoring activities. Documentation of urine and laboratory results and coordination with laboratory professionals were among the most frequently reported practices, yet remained below 50%. In contrast, essential clinical actions such as routine blood pressure measurement, annual urine dipstick testing, assessment of microalbuminuria, confirmation of proteinuria, estimation of glomerular filtration rate, and prescription of ACE inhibitors or ARBs when indicated were rarely performed on a systematic basis. Participation in training activities related to sickle cell disease and its renal complications was also infrequent.
